# Supplementary material
Source: PubMed Central journal article supplement (PMC7206849)
Supplement: supplementary_data_ddaa037.pdf [file supplementary_data_ddaa037.pdf]

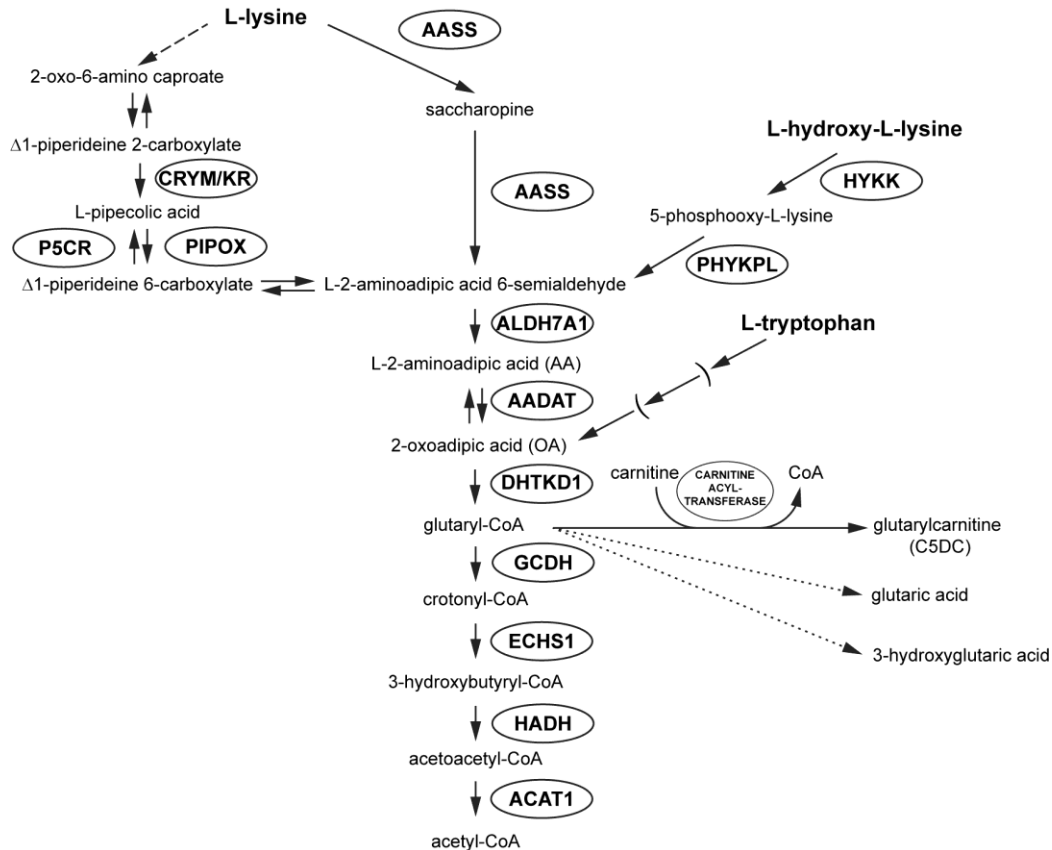

**Figure S1. The lysine degradation pathway. (Related to Fig. 1)**

The degradation of L-lysine may occur via two pathways: the saccharopine and the pipecolic acid pathway. The mitochondrial saccharopine pathway is well established and is the major pathway. It consists of nine different enzymatic steps that ultimately yield 2 acetyl-CoAs and several reducing equivalents. The pipecolic acid pathway, which is thought to be more active in the brain, proceeds via oxidative deamination with L-pipecolic acid as intermediate. Degradation of L-hydroxy-L-lysine leads to L-2-aminoadipic acid 6-semialdehyde and cytosolic degradation of tryptophan with kynurenine as intermediate leads to the production of OA. The intermediate OA is metabolized into glutaryl-CoA via oxidative decarboxylation by the DHTKD1, the E1 subunit of the 2-oxoadipic acid dehydrogenase complex (OADHc). Glutaryl-CoA is converted into crotonyl-CoA via oxidative decarboxylation by GCDH. The GCDH protein is deficient in GA1 leading to the accumulation of glutaryl-CoA metabolites: glutarylcarnitine (C5DC), glutaric acid and 3-hydroxyglutaric acid. The level of AA correlates with the amount of OA by reversible transamination catalyzed by AADAT. C5DC is the product of detoxification of accumulating glutaryl-CoA through conjugation with carnitine. AASS, alpha-aminoadipic semialdehyde synthase; ALDH7A1, alpha-aminoadipic semialdehyde dehydrogenase; AADAT, kynurenine/alpha-aminoadipate aminotransferase; CRYM/KR,  $\mu$ -crystallin/ketimine reductase; DHTKD1, dehydrogenase E1 and transketolase domain containing 1; GCDH, glutaryl-CoA dehydrogenase; ECHS1, enoyl-CoA hydratase; HADH, hydroxyacyl-coenzyme A dehydrogenase; ACAT1, acetyl-CoA acetyltransferase; P5CR, pyrroline-5-carboxylate reductase; PIPOX, peroxisomal sarcosine oxidase; HYKK, hydroxylysine kinase; PHYKPL, 5-phosphohydroxy-L-lysine phospho-lyase. Dashed arrows represent not fully characterized enzymatic steps.

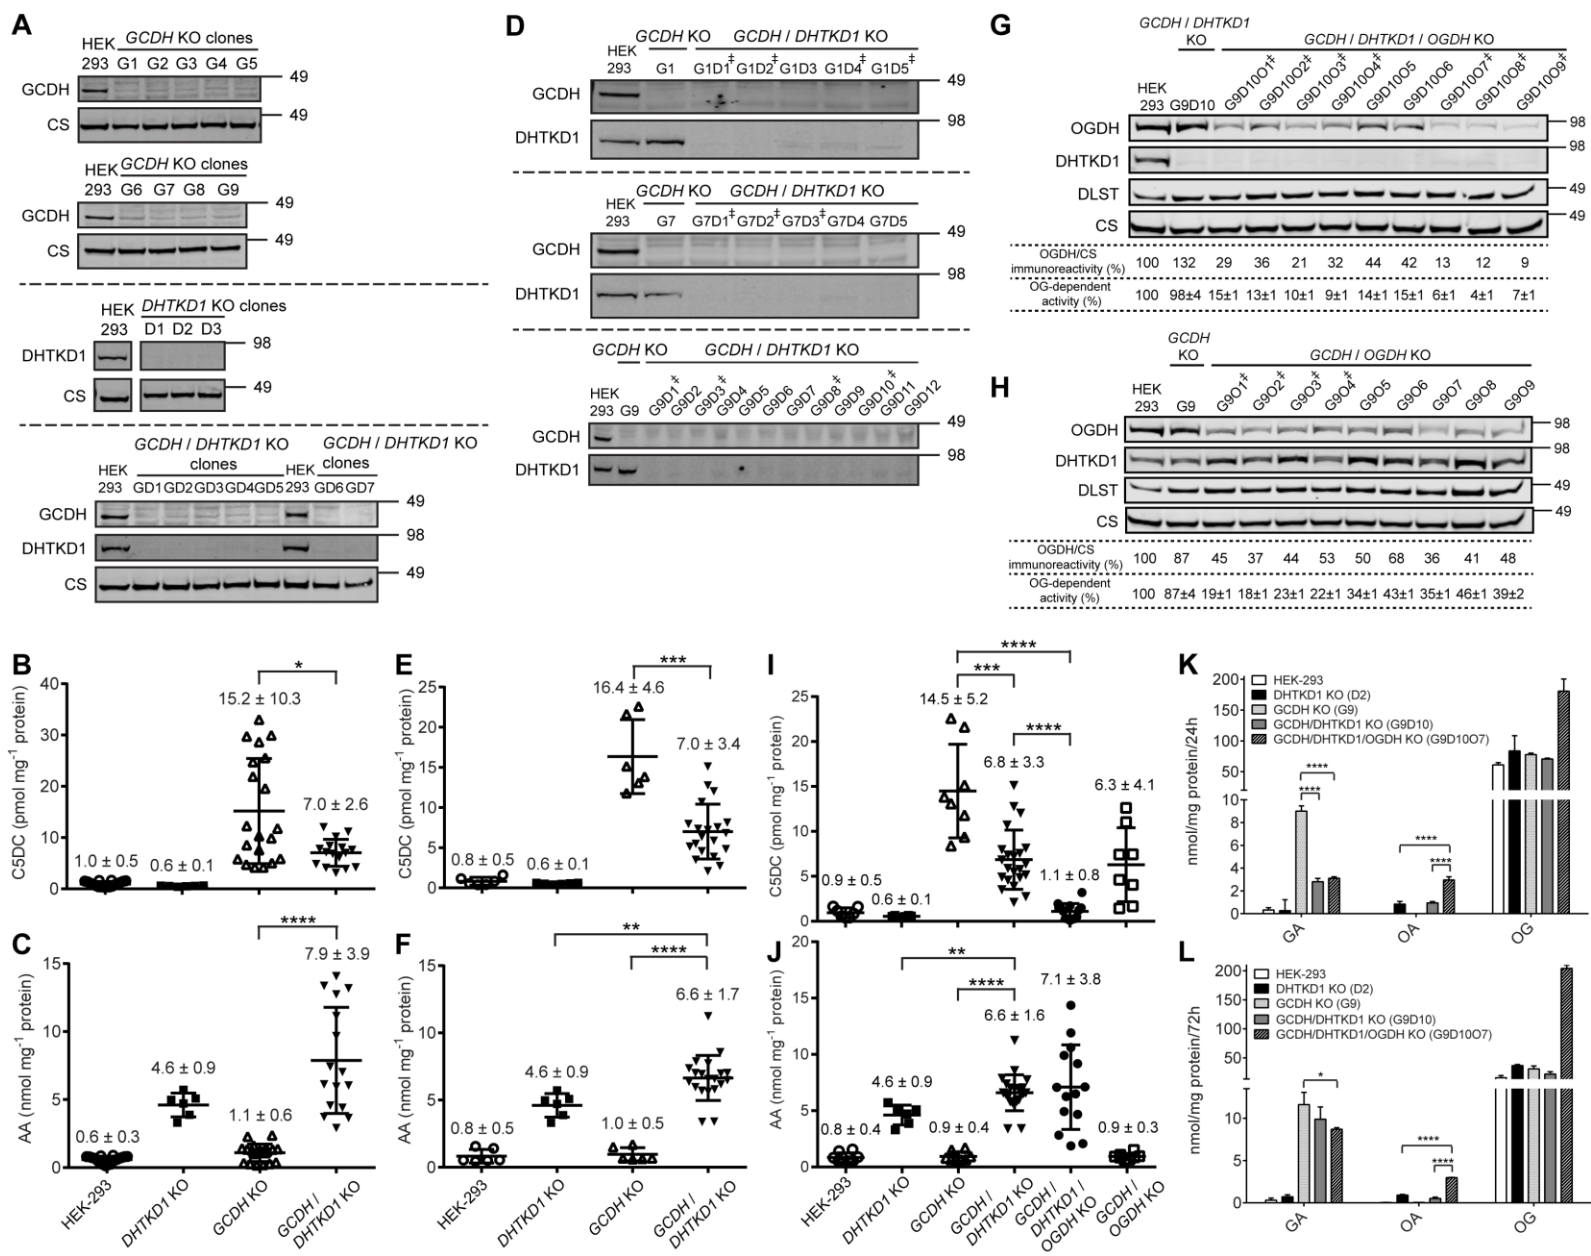

**Figure S2. *DHTKD1* KO reduces glutarylcarnitine in simultaneously and sequentially generated *GCDH/DHTKD1* double KO HEK-293 cell lines whereas *OGDH* KO reduces glutarylcarnitine to basal levels in HEK-293 *GCDH/DHTKD1/OGDH* triple KO cell lines. (Related to Fig. 2)**

(A) Immunoblot verification of *GCDH* single KO (*upper panel*), *DHTKD1* single KO (*middle panel*) and simultaneously generated *GCDH/DHTKD1* double KO (*lower panel*) clonal cell lines. Single *GCDH* KO clones are indicated as G#, single *DHTKD1* KO as D# and simultaneous double *GCDH/DHTKD1* KO clones as GD#. Citrate synthase (CS) was used as loading control. The position of molecular mass marker proteins (in kDa) is given.

(B and C) Biochemical analyses of C5DC (B) and AA (C) levels in HEK-293 *GCDH/DHTKD1* simultaneous double KO (▼) compared with HEK-293 *DHTKD1* single KO (■), HEK-293 *GCDH* single KO (△) and wild-type HEK-293 cells (○).

(D) Immunoblot verification of *GCDH/DHTKD1* double KOs generated from G1 (*upper panel*), G7 (*middle panel*) and G9 (*lower panel*). Single *GCDH* KO clones are indicated as G# and consecutively generated double *GCDH/DHTKD1* knockout clones as G#D#. The position of molecular mass marker proteins (in kDa) is given. ‡ indicates selected clones to measure the levels of C5DC and AA.

(E and F) Global statistical analyses of C5DC (E) and AA (F) levels in HEK-293 *GCDH/DHTKD1* double KO (▼) compared with HEK-293 *DHTKD1* single KO (■), HEK-293 *GCDH* single KO (△) and wild-type HEK-293 cells (○).

(G and H) Immunoblot verification of triple *GCDH/DHTKD1/OGDH* KO clones generated from G9D10 (G) and of double *GCDH/OGDH* KO clones generate from G9 (H). Single *GCDH* KO clones are indicated as G#, double *GCDH/DHTKD1* KO clones as G#D#, double *GCDH/OGDH* KO clones as G#O# and triple *GCDH/DHTKD1/OGDH* KO clones as G#D#O#. The position of molecular mass marker proteins (in kDa) is given. ‡ indicates selected clones to measure the levels of C5DC and AA. The immunoreactivity of *OGDH* was determined and normalized to CS levels for each sample and expressed as a percentage relative to *OGDH/CS* in HEK-293. The oxidative decarboxylation of OG in cell lysates of HEK-293 KOs was measured to evaluate *OGDH* knockout efficiency and is represented as a percentage relative to wild-type activity in HEK-293 cell lysates.

(I and J) Global statistical analyses of C5DC (I) and AA (J) levels in HEK-293 *GCDH/DHTKD1/OGDH* triple KO (●) and HEK-293 *GCDH/OGDH* double KO (□) compared with HEK-293 *GCDH/DHTKD1* double KO (▼), HEK-293 *GCDH* single KO (△), HEK-293 *DHTKD1* single KO (■) and wild-type HEK-293 cells (○).

(K and L) Quantification of glutaric acid (GA), OA and OG accumulation in the cell culture media of one clonal cell line for control, *GCDH* KO, *DHTKD1* KO, *GCDH/DHTKD1* double KO and *GCDH/DHTKD1/OGDH* triple KO at 24 (K) and 72 h (L).

Error bars indicate SD and the mean  $\pm$  SD of C5DC and AA levels are indicated above each group in panels B-C, E-F and I-J. \*,  $p < 0.05$ , \*\*,  $p < 0.01$ ; \*\*\*,  $p < 0.001$  and \*\*\*\*,  $p < 0.0001$ .

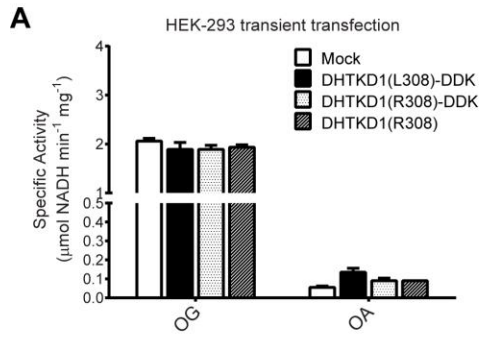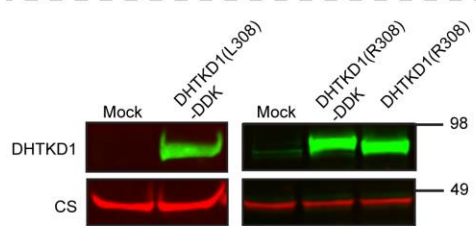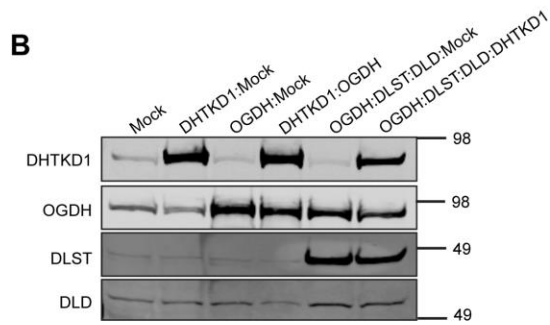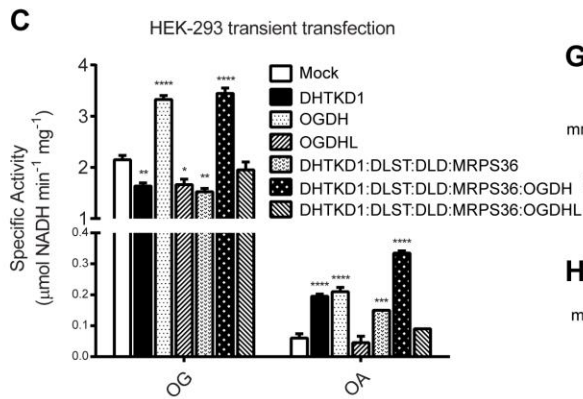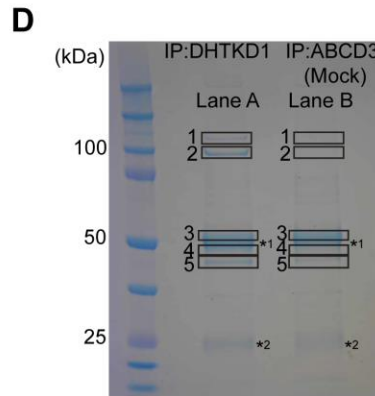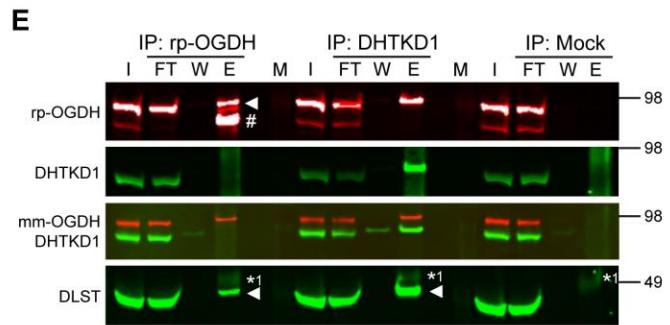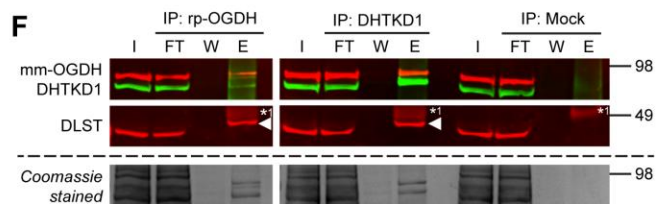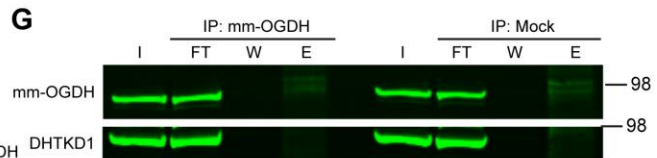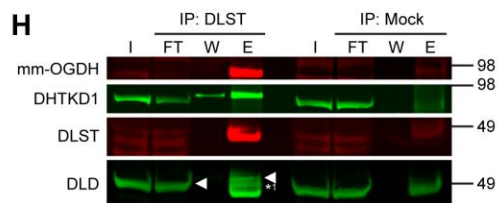

**Figure S3. Overexpression of DHTKD1 and OGDH increase the oxidative decarboxylation of 2-oxoadipic acid and immunoprecipitation of DHTKD1 with interacting partners from DBA/2J mouse liver or kidney. (Related to Fig. 3).**

(A) (*upper panel*) Oxidative decarboxylation of OG and OA in cell lysates of HEK-293 cells upon transient transfection with a rare *DHTKD1* variant (L308), the common variant (R308) and without C-terminal tags. 6.9  $\mu\text{g}$  of each plasmid construct was used for transfection. (*lower panel*) Immunoblot of HEK-293 transient transfections depicted on the upper panel. Citrate synthase (CS) was used as loading control and DDK denotes the C-terminal FLAG tag. The position of molecular mass marker proteins (in kDa) is given.

(B) Immunoblot of HEK-293 transient transfections depicted on Fig. 3A and Fig. S3C. The position of molecular mass marker proteins (in kDa) is given.

(C) Oxidative decarboxylation of OG and OA in cell lysates of HEK-293 cells upon transient transfection of the indicated genes: *DHTKD1*, *DLST*, *DLD*, *OGDH*, *OGDHL* and *MRPS36*. The amount of DNA has been maintained constant as follows: 6.9  $\mu\text{g}$  in Mock, *DHTKD1*, *OGDH* and *OGDHL* conditions; 1.73  $\mu\text{g}$  of each construct in *DHTKD1:DLST:DLD:MRPS36* condition; and 1.38  $\mu\text{g}$  of each construct in *DHTKD1:DLST:DLD:MRPS36:OGDH* and *DHTKD1:DLST:DLD:MRPS36:OGDHL* conditions.

(D) Coomassie-stained SDS-PAGE gel of *DHTKD1* interacting proteins (lane A) and negative control (lane B). Gel pieces (1 through 5) were cut out for mass spectrometry-based protein identification. \*<sup>1</sup> and \*<sup>2</sup> indicate the heavy and light chain of the IP antibody, respectively. The position of molecular mass marker proteins (in kDa) is given. Proteins specifically identified in each gel slice are shown in Table S1.

(E) *OGDH* was immunoprecipitated from liver homogenate of DBA/2J mouse using a rabbit polyclonal anti-*OGDH* antibody (rp-*OGDH*, GTX33374). (*upper panel*) The triangle indicates the position of *OGDH* and # indicates unspecific immunoprecipitation of a protein that was identified as plasminogen by mass spectrometry and is not detected by the monoclonal anti-*OGDH* antibody. (*lower panel*). The triangle indicates the position of the co-IP protein (*DLST*) close to the heavy chain of the IP antibody.

(F) *OGDH* was immunoprecipitated from kidney homogenate of DBA/2J mouse using a rabbit polyclonal anti-*OGDH* antibody (rp-*OGDH*, GTX33374). Kidney has a lower expression of plasminogen when compared with liver. Immunoblot analysis showed *DLST* interacting with *OGDH*. A band was detected using the anti-*DHTKD1* antibody, although with a slightly lower molecular weight than expected for *DHTKD1*. The triangle indicates the position of the co-IP protein (*DLST*) close to the heavy chain of the IP antibody.

(G) A third attempt to efficiently immunoprecipitate *OGDH* from DBA/2J mouse liver homogenate was performed using a monoclonal anti-*OGDH* antibody (mm-*OGDH*, 66285-1-Ig). No *OGDH* was detected in the eluted fraction.

(H) *DLST* was immunoprecipitated from DBA/2J mouse liver homogenate. The triangle indicates the position of the co-IP protein (*DLD*) close to the heavy chain of the IP antibody. The position of molecular mass marker proteins (in kDa) is given.

Aliquots of homogenate (I, input: 2.5% of total fraction volume), the unbound protein after incubation with IP antibody (FT, flow-through: 2.5% of total fraction volume), the last wash (W: 2% of total fraction volume) and eluted fraction (E: 100% of total fraction volume) were analyzed by WB by successively using a rabbit polyclonal anti-*OGDH* (GTX33374) or mouse monoclonal anti-*OGDH* (mm-*OGDH*, 66285-1-Ig), anti-*DHTKD1*, anti-*DLST* antibodies or Coomassie stained SDS-PAGE gel (E-G) or by successively using anti-*DHTKD1*, mouse monoclonal anti-*OGDH*, anti-*DLST* and anti-*DLD* antibodies (H). Heavy (\*<sup>1</sup>) chain of IP antibody is indicated.

**A**

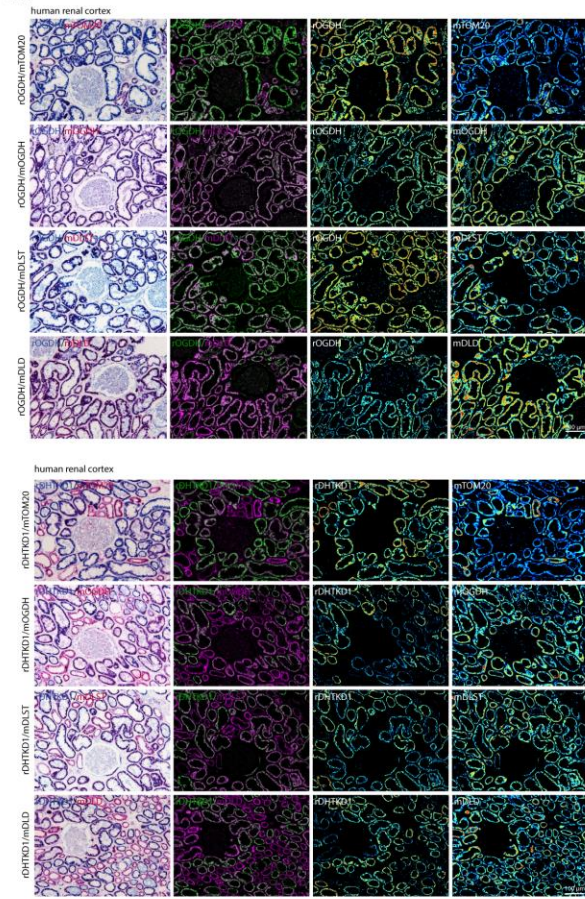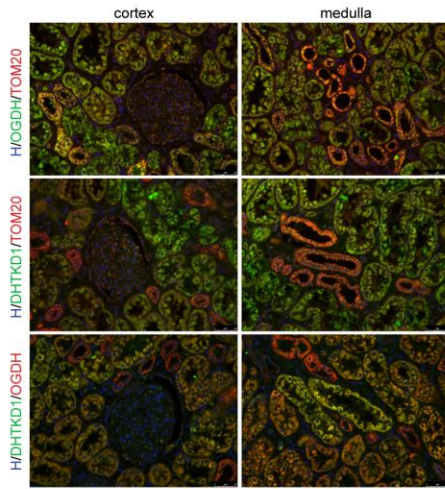

**B**

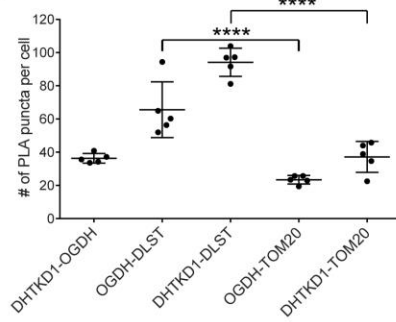

**C**

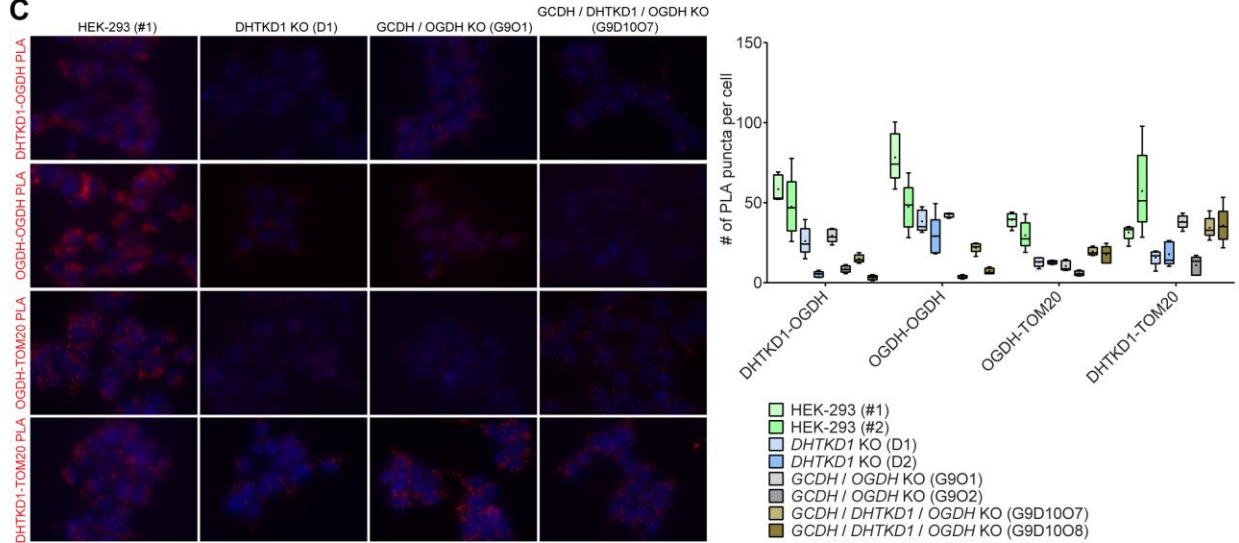

**Figure S4. Immunofluorescence and proximity ligation assay of DHTKD1 with interacting partners in human kidney and HEK-293 cells, respectively. (Related to Fig. 3).**

(A) Colocalization of DHTKD1 and OGDH in human kidney (cortex and medulla cryosections) shown by sequential two-colour brightfield immunostaining (spectral image analysis, left panels) and by double immunofluorescence (right panel). TOM20 was used as a negative control. Scale bars: 100  $\mu\text{m}$  (left panels) and 50  $\mu\text{m}$  (right panel).

(B) Quantification of in situ PLA of OGDH, DHTKD1 and DLST interactions in HEK-293 cells (Fig. 3E). TOM20 was used as a negative control. Error bars indicate SD. \*\*\*\*,  $p < 0.0001$ .

(C) In situ PLA analysis of DHTKD1 and OGDH interaction in HEK-293 and knockout cell lines: *DHTKD1* KO, *GCDH/OGDH* KO and *GCDH/DHTKD1/OGDH* KO. Representative images of PLA (red) from one clone of each cell line and quantification analysis are shown. Clones are identified as in Fig. 2. TOM20 served as a negative control. Scale bars: 10  $\mu\text{m}$ .

**Table S1. The genotype distribution in a cross of *Gcdh*<sup>+/-</sup> *Dhtkd1*<sup>D2/B6</sup> X *Gcdh*<sup>+/-</sup> *Dhtkd1*<sup>D2/B6</sup>. Related to Fig. 1.**

|                                | <i>Gcdh</i> <sup>+/+</sup> | <i>Gcdh</i> <sup>+/-</sup> | <i>Gcdh</i> <sup>-/-</sup> |
|--------------------------------|----------------------------|----------------------------|----------------------------|
| <i>Dhtkd1</i> <sup>D2/D2</sup> | 7 (12)                     | 28 (23)                    | 15 (12)                    |
| <i>Dhtkd1</i> <sup>D2/B6</sup> | 23 (23)                    | 51 (47)                    | 17 (23)                    |
| <i>Dhtkd1</i> <sup>B6/B6</sup> | 10 (12)                    | 26 (23)                    | 9 (12)                     |

Observed and expected (in parenthesis) progeny. Expected numbers are calculated based on the total number of pups (186). The Chi square statistic for these numbers is 7.054. The threshold for 5 degrees of freedom (# genotypic combinations - # alleles) and an alpha level of 0.05 is 11.0705.



**Table S2. Mass spectrometric analysis of interacting proteins identified by IP of DHTKD1 from DBA/2J mouse liver. Related to Fig. 3B.**

| Gel slice # | Protein Name                                                                          | Protein accession number | MW <sup>a</sup>  | # unique peptides |        | # exclusive spectra |        | % sequence coverage |        |
|-------------|---------------------------------------------------------------------------------------|--------------------------|------------------|-------------------|--------|---------------------|--------|---------------------|--------|
|             |                                                                                       |                          |                  | Lane A            | Lane B | Lane A              | Lane B | Lane A              | Lane B |
| 1           | 2-oxoglutarate dehydrogenase                                                          | Q60597<br>(ODO1_MOUSE)   | 116 kDa<br>(112) | 7                 | 0      | 24                  | 0      | 7.2                 | -      |
|             | Probable 2-oxoglutarate dehydrogenase E1 component DHTKD1                             | A2ATU0<br>(DHTK1_MOUSE)  | 103 kDa<br>(100) | 2                 | 0      | 3                   | 0      | 2.0                 | -      |
| 2           | 2-oxoglutarate dehydrogenase                                                          | Q60597<br>(ODO1_MOUSE)   | 116 kDa<br>(112) | 3                 | 0      | 3                   | 0      | 2.5                 | -      |
|             | Probable 2-oxoglutarate dehydrogenase E1 component DHTKD1                             | A2ATU0<br>(DHTK1_MOUSE)  | 103 kDa<br>(100) | 17                | 0      | 60                  | 0      | 16.6                | -      |
|             | Dihydropyridoxylsuccinyltransferase component of 2-oxoglutarate dehydrogenase complex | Q9D2G2<br>(ODO2_MOUSE)   | 49 kDa<br>(41)   | 2                 | 0      | 2                   | 0      | 4.6                 | -      |
| Gel slice # | Protein Name                                                                          | Protein accession number | MW <sup>a</sup>  | # unique peptides |        | # exclusive spectra |        | % sequence coverage |        |
|             |                                                                                       |                          |                  | Lane A            | Lane B | Lane A              | Lane B | Lane A              | Lane B |
| 3           | Probable 2-oxoglutarate dehydrogenase E1 component DHTKD1                             | A2ATU0<br>(DHTK1_MOUSE)  | 103 kDa<br>(100) | 3                 | 0      | 3                   | 0      | 3.1                 | -      |
|             | Dihydropyridoxyl dehydrogenase                                                        | O08749<br>(DLDH_MOUSE)   | 54 kDa<br>(50)   | 19                | 3      | 57                  | 3      | 39.9                | 7.5    |
|             | Dihydropyridoxylsuccinyltransferase component of 2-oxoglutarate dehydrogenase complex | Q9D2G2<br>(ODO2_MOUSE)   | 49 kDa<br>(41)   | 12                | 4      | 43                  | 4      | 32.8                | 8.8    |
| 4           | Probable 2-oxoglutarate dehydrogenase E1 component DHTKD1                             | A2ATU0<br>(DHTK1_MOUSE)  | 103 kDa<br>(100) | 3                 | 0      | 3                   | 0      | 2.9                 | -      |
|             | Dihydropyridoxyl dehydrogenase                                                        | O08749<br>(DLDH_MOUSE)   | 54 kDa<br>(50)   | 4                 | 0      | 4                   | 0      | 8.3                 | -      |
|             | Dihydropyridoxylsuccinyltransferase component of 2-oxoglutarate dehydrogenase complex | Q9D2G2<br>(ODO2_MOUSE)   | 49 kDa<br>(41)   | 8                 | 0      | 32                  | 0      | 17.8                | -      |
| 5           | Probable 2-oxoglutarate dehydrogenase E1 component                                    | A2ATU0<br>(DHTK1_MOUSE)  | 103 kDa<br>(100) | 1                 | 0      | 1                   | 0      | 1.1                 | -      |

| DHKTD1                                                                                                     |                        |                |   |   |   |   |     |     |
|------------------------------------------------------------------------------------------------------------|------------------------|----------------|---|---|---|---|-----|-----|
| Dihydrolipoyl dehydrogenase                                                                                | O08749<br>(DLDH_MOUSE) | 54 kDa<br>(50) | 2 | 0 | 2 | 0 | 3.7 | -   |
| Dihydrolipoyllysine-residue<br>succinyltransferase component<br>of 2-oxoglutarate<br>dehydrogenase complex | Q9D2G2<br>(ODO2_MOUSE) | 49 kDa<br>(41) | 2 | 0 | 3 | 0 | 4.4 | -   |
| Glutaryl-CoA dehydrogenase                                                                                 | Q60759<br>(GCDH_MOUSE) | 49 kDa<br>(44) | 1 | 2 | 1 | 2 | 3.2 | 5.9 |

Results represent the proteins specifically identified in each gel slice when peptides were run against a library of proteins likely to interact with DHTKD1 (Protein accession numbers: A2ATU0, Q60597, E9Q7L0, Q9D2G2, O08749, Q60759, Q8BHG1, Q9CQX8 and Q9DCX2. Peptides were selected using a stringent filter (99.0% protein threshold, 1 min. peptide and 95% peptide threshold) to avoid false positives. Sequence coverage represents the percentage of sequence (full length protein) matching with peptides found in the analysis. <sup>a</sup>Molecular weight of processed form of the protein (without mitochondrial transit peptide) is shown in parenthesis.
